# Supplementary material
Source: publisher figshare collection journal article supplement (https://tandf.figshare.com/ndownloader/files/15294023)
Supplement: Supplementary file 1 [file 15294023]

**Online Appendix**

***Procedural characteristics***

*Table A1 Procedural characteristics and governmental responses*

|  | required | government initiative | non-government initiative |
| --- | --- | --- | --- |
| Acquiescence | 1 | 2 | 0 |
| Substitution | 2 | 1 | 0 |
| revision | 1 | 2 | 0 |
| differentiation | 1 | 0 | 0 |
| reinterpretation | 1 | 0 | 1 |
| dilution | 0 | 1 | 1 |
| DISREGARD | 0 | 1 | 0 |

***Referendum votes***

*Figure A1 Pro EU-votes and governmental responses*

Note: Average percentage of pro-EU votes across response types.

***Government-level Euroscepticism***

*Figure 2 Positions of government parties and governmental responses*

Note: Based on 12 negative EU referendums (without Norway and Switzerland before 2014 for lack of data). Average EU positions of parties in government, weighted by their share of seats in the parliament. Lower values indicate higher Euroscepticism. Scores from Chapel Hill expert survey from the survey year closest to the referendum response (Bakker et al. 2015; Ray 1999).

**References**

Bakker, R. et al. (2015) ‘Measuring party positions in Europe: The Chapel Hill expert survey trend file, 1999-2010’, *Party Politics* 21(1): 143-152.

Ray, L. (1999) ‘Measuring party orientations toward European integration: Results from an expert survey’, *European Journal of Political Research* 36(2): 283-306.
